# Supplementary material
Source: PubMed Central journal article supplement (PMC8191375)

## SUPPLEMENTAL MATERIALS

**Supplemental Table I.** Comparison of patients with and without documented race/ethnicity

| <b>Characteristic</b>                | <b>Race Documented<br/>(N=7,902)</b> | <b>Race Not Documented<br/>(N=688)</b> | <b>Standardized<br/>Difference (%)</b> |
|--------------------------------------|--------------------------------------|----------------------------------------|----------------------------------------|
| <b>Baseline Demographics</b>         |                                      |                                        |                                        |
| Age, years                           | 63.0 (49.0-75.0)                     | 61.0 (47.5-73.0)                       | 9.85                                   |
| Female                               | 3,555 (45.0%)                        | 282 (41.0%)                            | 8.09                                   |
| Insurance                            |                                      |                                        | 19.19                                  |
| Private/Commercial                   | 2,468 (31.2%)                        | 218 (31.7%)                            |                                        |
| Medicare                             | 3,100 (39.2%)                        | 245 (35.6%)                            |                                        |
| Medicaid                             | 1,350 (17.1%)                        | 151 (21.9%)                            |                                        |
| Other Government                     | 47 (0.6%)                            | 2 (0.3%)                               |                                        |
| Other/ND                             | 221 (2.8%)                           | 34 (4.9%)                              |                                        |
| Uninsured/Self-pay                   | 518 (6.6%)                           | 32 (4.7%)                              |                                        |
| Education                            |                                      |                                        |                                        |
| Advanced degree                      | 11.63 (5.64-19.50)                   | 12.11 (8.04-21.13)                     | 20.81                                  |
| College degree                       | 26.41 (20.18-33.55)                  | 26.09 (23.12-31.88)                    | 6.11                                   |
| High School                          | 43.82 (33.34-51.99)                  | 35.55 (30.10-45.45)                    | 46.50                                  |
| Did not complete high school         | 14.97 (7.65-25.20)                   | 19.15 (9.90-29.64)                     | 25.93                                  |
| Household income                     | 56,015 (41,097-80,179)               | 56,383 (43,862-80,542)                 | 4.67                                   |
| Unemployment rate                    | 6.00 (4.30-8.50)                     | 7.00 (4.70-9.20)                       | 15.64                                  |
| <b>Medical History</b>               |                                      |                                        |                                        |
| Diabetes                             | 2,927 (37.0%)                        | 238 (34.6%)                            | 5.11                                   |
| Hypertension                         | 4,751 (60.1%)                        | 348 (50.6%)                            | 19.29                                  |
| Prior coronary artery disease        | 732 (9.3%)                           | 53 (7.7%)                              | 5.60                                   |
| Prior heart failure                  | 936 (11.8%)                          | 40 (5.8%)                              | 21.38                                  |
| Prior cerebrovascular disease        | 714 (9.0%)                           | 37 (5.4%)                              | 14.18                                  |
| Prior PAD                            | 218 (2.8%)                           | 13 (1.9%)                              | 5.77                                   |
| Atrial fibrillation/flutter          | 772 (9.8%)                           | 32 (4.7%)                              | 19.89                                  |
| Pulmonary Disease                    | 1,475 (18.7%)                        | 102 (14.8%)                            | 10.30                                  |
| PE/DVT                               | 352 (4.5%)                           | 30 (4.4%)                              | 0.46                                   |
| Cancer                               | 885 (11.2%)                          | 55 (8.0%)                              | 10.90                                  |
| Immune Disorder                      | 366 (4.6%)                           | 25 (3.6%)                              | 5.02                                   |
| Kidney Function                      |                                      |                                        | 12.06                                  |
| GFR $\geq$ 90                        | 2,078 (26.3%)                        | 188 (27.3%)                            |                                        |
| GFR 60-<90                           | 2,648 (33.5%)                        | 234 (34.0%)                            |                                        |
| 30-<60                               | 1,776 (22.5%)                        | 156 (22.7%)                            |                                        |
| GFR <30                              | 836 (10.6%)                          | 71 (10.3%)                             |                                        |
| Dialysis                             | 321 (4.1%)                           | 14 (2.0%)                              |                                        |
| Smoking/Vaping                       | 519 (6.6%)                           | 34 (4.9%)                              | 6.99                                   |
| <b>Diagnosis Data</b>                |                                      |                                        |                                        |
| Days from symptom onset to diagnosis | 5.0 (2.0-8.0)                        | 6.0 (3.0-9.0)                          | 18.23                                  |
| Timing of COVID-19 diagnosis         |                                      |                                        | 6.49                                   |
| Prior to hospital arrival            | 2,163 (27.4%)                        | 169 (24.6%)                            |                                        |
| During Hospitalization               | 5,614 (71.0%)                        | 508 (73.8%)                            |                                        |
| After hospital discharge             | 73 (0.9%)                            | 6 (0.9%)                               |                                        |
| Unknown                              | 26 (0.3%)                            | 2 (0.3%)                               |                                        |
| Off-hour presentation                | 4,485 (56.8%)                        | 414 (60.2%)                            | 2.60                                   |

**Supplemental Table II.** Odds ratios of clinical outcomes stratified by age groups

Odds ratios of clinical outcomes by races among patients < 55 years old

| Outcome                    | Model 1 |             |         | Model 2 |             |         | Model 3 |             |         | Model 4 |             |         |
|----------------------------|---------|-------------|---------|---------|-------------|---------|---------|-------------|---------|---------|-------------|---------|
|                            | OR      | (95% CI)    | P-value |
| <b>Mortality</b>           |         |             |         |         |             |         |         |             |         |         |             |         |
| Non-Hispanic White (ref)   |         |             | 0.4194  |         |             | 0.5554  |         |             | 0.6963  |         |             | 0.6109  |
| Black                      | 1.03    | (0.65-1.63) |         | 0.92    | (0.56-1.51) |         | 0.79    | (0.47-1.33) |         | 0.83    | (0.48-1.43) |         |
| Hispanic                   | 0.74    | (0.47-1.17) |         | 0.71    | (0.42-1.19) |         | 0.76    | (0.44-1.29) |         | 0.70    | (0.40-1.22) |         |
| Asian                      | 0.82    | (0.35-1.91) |         | 0.96    | (0.40-2.33) |         | 1.05    | (0.42-2.59) |         | 1.03    | (0.40-2.64) |         |
| <b>MACE</b>                |         |             |         |         |             |         |         |             |         |         |             |         |
| Non-Hispanic White (ref)   |         |             | 0.0968  |         |             | 0.3083  |         |             | 0.5588  |         |             | 0.432   |
| Black                      | 1.03    | (0.69-1.53) |         | 0.99    | (0.64-1.52) |         | 0.80    | (0.51-1.25) |         | 0.82    | (0.51-1.31) |         |
| Hispanic                   | 0.67    | (0.45-1.00) |         | 0.69    | (0.44-1.09) |         | 0.71    | (0.44-1.14) |         | 0.66    | (0.41-1.08) |         |
| Asian                      | 0.72    | (0.34-1.53) |         | 0.82    | (0.38-1.77) |         | 0.82    | (0.36-1.84) |         | 0.83    | (0.36-1.91) |         |
| <b>WHO Severity score*</b> |         |             |         |         |             |         |         |             |         |         |             |         |
| Non-Hispanic White (ref)   |         |             | 0.164   |         |             | 0.2376  |         |             | 0.1204  |         |             | 0.0867  |
| Black                      | 0.97    | (0.72-1.29) |         | 0.98    | (0.71-1.34) |         | 0.83    | (0.60-1.15) |         | 0.84    | (0.60-1.17) |         |
| Hispanic                   | 0.80    | (0.60-1.06) |         | 0.87    | (0.63-1.19) |         | 0.88    | (0.63-1.22) |         | 0.76    | (0.54-1.07) |         |
| Asian                      | 1.23    | (0.78-1.95) |         | 1.40    | (0.87-2.26) |         | 1.49    | (0.91-2.43) |         | 1.40    | (0.83-2.34) |         |

Odds ratios of clinical outcomes by races among patients 55-70 years old

| Outcome                    | Model 1          |         | Model 2          |         | Model 3          |         | Model 4          |         |
|----------------------------|------------------|---------|------------------|---------|------------------|---------|------------------|---------|
|                            | OR (95% CI)      | P-value |
| <b>Mortality</b>           |                  |         |                  |         |                  |         |                  |         |
| Non-Hispanic White (ref)   |                  | 0.1703  |                  | 0.3812  |                  | 0.9442  |                  | 0.8824  |
| Black                      | 1.17 (0.89-1.54) |         | 1.11 (0.81-1.51) |         | 0.98 (0.71-1.36) |         | 1.01 (0.72-1.42) |         |
| Hispanic                   | 0.85 (0.63-1.16) |         | 0.84 (0.60-1.18) |         | 0.90 (0.63-1.29) |         | 0.89 (0.61-1.28) |         |
| Asian                      | 0.82 (0.49-1.39) |         | 0.85 (0.50-1.46) |         | 0.98 (0.56-1.72) |         | 0.89 (0.50-1.62) |         |
| <b>MACE</b>                |                  |         |                  |         |                  |         |                  |         |
| Non-Hispanic White (ref)   |                  | 0.0573  |                  | 0.2196  |                  | 0.8309  |                  | 0.6863  |
| Black                      | 1.20 (0.93-1.56) |         | 1.11 (0.83-1.48) |         | 1.01 (0.75-1.36) |         | 1.03 (0.75-1.41) |         |
| Hispanic                   | 0.83 (0.62-1.11) |         | 0.81 (0.59-1.11) |         | 0.88 (0.63-1.22) |         | 0.85 (0.60-1.20) |         |
| Asian                      | 0.81 (0.50-1.33) |         | 0.85 (0.51-1.41) |         | 0.96 (0.57-1.63) |         | 0.88 (0.51-1.53) |         |
| <b>WHO Severity score*</b> |                  |         |                  |         |                  |         |                  |         |
| Non-Hispanic White (ref)   |                  | 0.0913  |                  | 0.2708  |                  | 0.1795  |                  | 0.3377  |
| Black                      | 1.03 (0.83-1.29) |         | 1.00 (0.78-1.27) |         | 0.91 (0.71-1.17) |         | 0.91 (0.70-1.18) |         |
| Hispanic                   | 0.78 (0.61-0.99) |         | 0.82 (0.63-1.07) |         | 0.90 (0.68-1.19) |         | 0.85 (0.63-1.13) |         |
| Asian                      | 1.07 (0.73-1.57) |         | 1.16 (0.78-1.71) |         | 1.41 (0.94-2.11) |         | 1.23 (0.81-1.89) |         |

Odds ratios of clinical outcomes by races among patients > 70 years old

| Outcome                    | Model 1 |             |         | Model 2 |             |         | Model 3 |             |         | Model 4 |             |         |
|----------------------------|---------|-------------|---------|---------|-------------|---------|---------|-------------|---------|---------|-------------|---------|
|                            | OR      | (95% CI)    | P-value |
| <b>Mortality</b>           |         |             |         |         |             |         |         |             |         |         |             |         |
| Non-Hispanic White (ref)   |         |             | 0.0293  |         |             | 0.0214  |         |             | 0.0232  |         |             | 0.0177  |
| Black                      | 0.78    | (0.61-0.99) |         | 0.73    | (0.56-0.96) |         | 0.76    | (0.57-1.00) |         | 0.78    | (0.58-1.04) |         |
| Hispanic                   | 0.83    | (0.65-1.07) |         | 0.81    | (0.62-1.06) |         | 0.87    | (0.66-1.16) |         | 0.97    | (0.72-1.30) |         |
| Asian                      | 1.34    | (0.93-1.93) |         | 1.33    | (0.90-1.96) |         | 1.47    | (0.98-2.20) |         | 1.67    | (1.09-2.56) |         |
| <b>MACE</b>                |         |             |         |         |             |         |         |             |         |         |             |         |
| Non-Hispanic White (ref)   |         |             | 0.0139  |         |             | 0.0181  |         |             | 0.0287  |         |             | 0.0204  |
| Black                      | 0.80    | (0.64-1.02) |         | 0.79    | (0.61-1.02) |         | 0.85    | (0.65-1.11) |         | 0.88    | (0.66-1.16) |         |
| Hispanic                   | 0.80    | (0.63-1.02) |         | 0.79    | (0.61-1.03) |         | 0.88    | (0.67-1.16) |         | 0.98    | (0.74-1.31) |         |
| Asian                      | 1.39    | (0.98-1.98) |         | 1.40    | (0.96-2.04) |         | 1.59    | (1.07-2.34) |         | 1.79    | (1.18-2.71) |         |
| <b>WHO Severity score*</b> |         |             |         |         |             |         |         |             |         |         |             |         |
| Non-Hispanic White (ref)   |         |             | 0.0186  |         |             | 0.0141  |         |             | 0.02    |         |             | 0.0188  |
| Black                      | 0.78    | (0.62-0.98) |         | 0.73    | (0.57-0.94) |         | 0.75    | (0.58-0.97) |         | 0.77    | (0.58-1.01) |         |
| Hispanic                   | 0.83    | (0.66-1.05) |         | 0.80    | (0.62-1.03) |         | 0.86    | (0.66-1.11) |         | 0.94    | (0.71-1.24) |         |
| Asian                      | 1.33    | (0.94-1.88) |         | 1.28    | (0.89-1.84) |         | 1.40    | (0.96-2.04) |         | 1.56    | (1.04-2.33) |         |

Model 1 adjusts for age alone. Model 2 includes Model 1 and sociodemographic factors. Model 3 includes Model 2 and medical history. Model 4 includes Model 3 and presentation features.

\* Proportional odds model for ordinal outcomes

MACE: death, myocardial infarction, stroke, heart failure;

COVID-19 cardiorespiratory ordinal severity score (from worst to best): death, cardiac arrest, mechanical ventilation with mechanical circulatory support, mechanical ventilation with vasopressors/inotrope support, mechanical ventilation without requiring hemodynamic support, and hospitalization without any of the above

**Supplemental Table III.** Sensitivity analyses examining association between race/ethnicity and outcomes with generalized estimating equations modeling adjusting for sociodemographic, clinical, and presentation features among 7,868 patients hospitalized for COVID-19

|                                  | <b>OR (95% CI)</b> | <b>P-value</b> | <b>Global P-value</b> |
|----------------------------------|--------------------|----------------|-----------------------|
| <b>Mortality</b>                 |                    |                |                       |
| Non-Hispanic White               | Reference          |                | 0.0535                |
| Black                            | 0.96 (0.80-1.15)   | 0.6639         |                       |
| Hispanic                         | 0.95 (0.73-1.23)   | 0.7050         |                       |
| Asian                            | 1.29 (1.05-1.58)   | 0.0159         |                       |
| <b>MACE</b>                      |                    |                |                       |
| Non-Hispanic White               | Reference          |                | 0.0873                |
| Black                            | 1.02 (0.86-1.20)   | 0.8585         |                       |
| Hispanic                         | 0.92 (0.73-1.16)   | 0.4707         |                       |
| Asian                            | 1.27 (1.02-1.57)   | 0.0290         |                       |
| <b>COVID-19 Disease Severity</b> |                    |                |                       |
| Non-Hispanic White               | Reference          |                | 0.0010                |
| Black                            | 0.92 (0.78-1.08)   | 0.2986         |                       |
| Hispanic                         | 0.90 (0.72-1.13)   | 0.3634         |                       |
| Asian                            | 1.36 (1.14-1.63)   | 0.0007         |                       |

MACE: death, myocardial infarction, stroke, heart failure; COVID-19 cardiorespiratory ordinal severity score: death, cardiac arrest, mechanical ventilation with mechanical circulatory support, mechanical ventilation with vasopressors/inotrope support, mechanical ventilation without requiring hemodynamic support, and hospitalization without any of the above

**Supplemental Figure I.** Weekly hospitalizations for COVID-19 by race/ethnicity March-May

2020

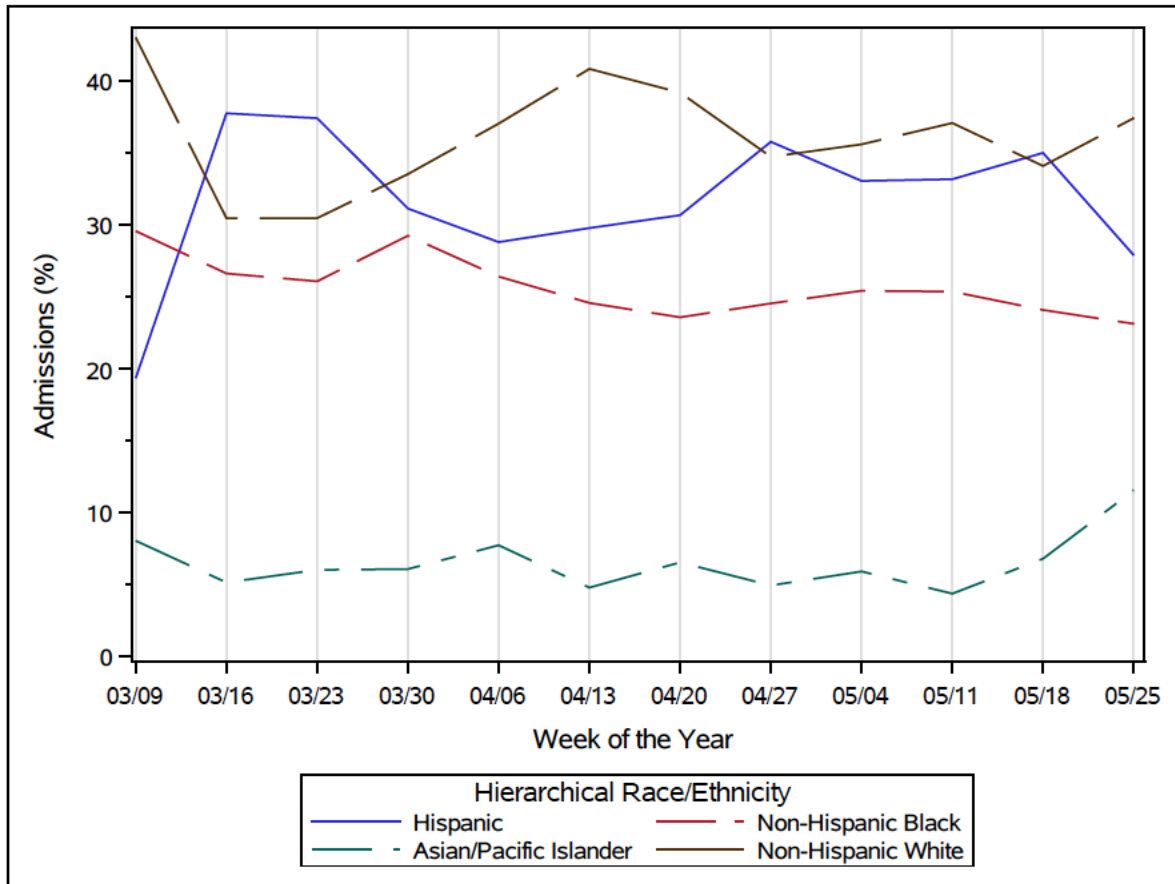

**Supplemental Figure II.** Ratio of patient race/ethnicity over race/ethnicity of residents in site zip code, with non-Hispanic White as the comparator.

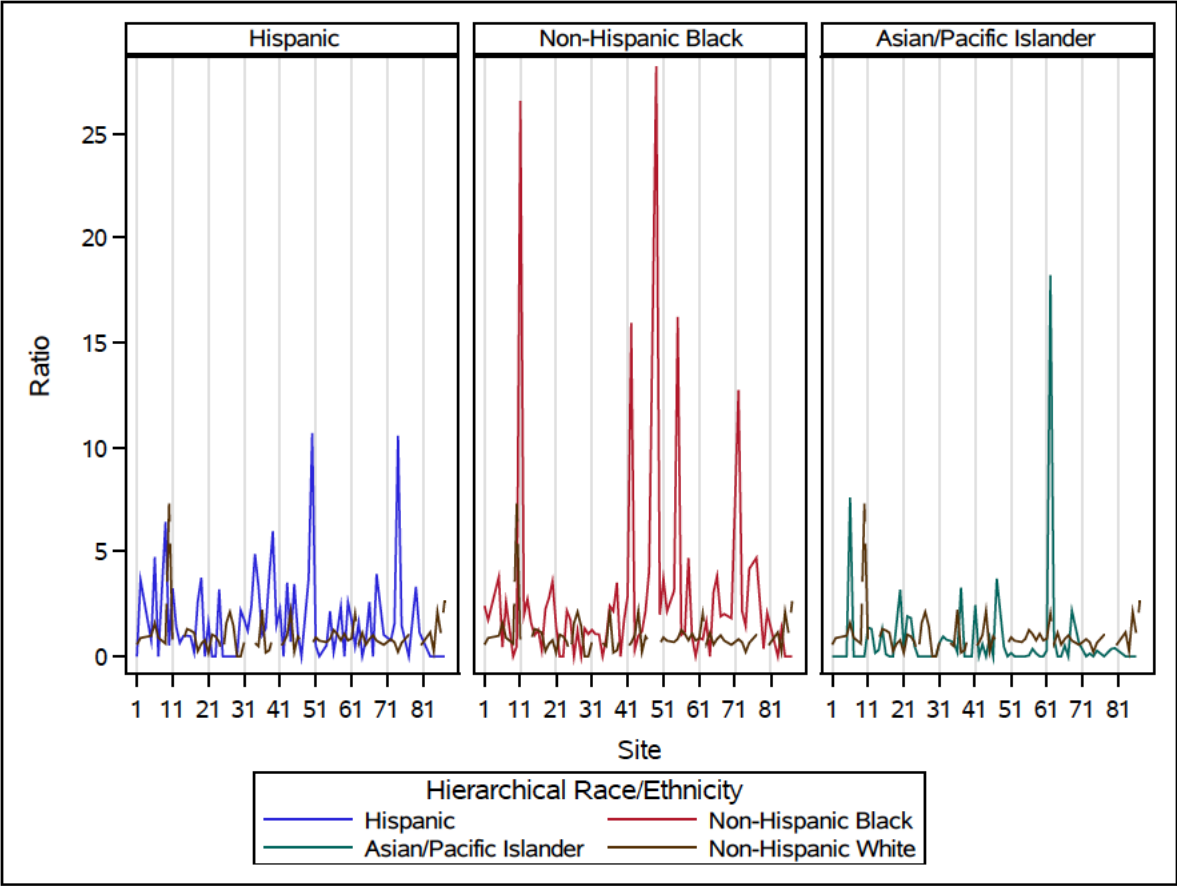

Supplement: cir-143-2332-s001.pdf [file cir-143-2332-s001.pdf]
